# Supplementary material for: Allogeneic hematopoietic stem cell transplant outcomes in adults with inherited myeloid malignancies
Source: PubMed Central journal article supplement — Blood Adv. 2022 Aug 28;7(4):549–54. doi: 10.1182/bloodadvances.2022008172 (PMC9979761; doi:10.1182/bloodadvances.2022008172), 2022-08-28
Supplement: BLOODA_ADV-2022-008172-mmc1.pdf [file BLOODA_ADV-2022-008172-mmc1.pdf]

## SUPPLEMENTARY DATA

### Supplementary Materials and Methods

#### *Patients and germline testing*

Indications for germline testing included: a personal history of two cancers, one of which was a hematopoietic malignancy; family history of another hematopoietic malignancy within two generations of the index case; family history of a non-hematopoietic tumor diagnosed at age 50 or younger within two generation of the index case; and/or the identification of gene variants on tumor molecular profiling associated with HHMs<sup>1</sup>. Written informed consent was obtained according to approved institutional protocols in accordance with the Declaration of Helsinki. Single nucleotide and copy number variants were classified for pathogenicity using American College of Medical Genetics and Genomics/Association for Molecular Pathology guidelines (**Figure S1**)<sup>2</sup>.

#### *Next generation sequencing*

Exome sequencing was performed using the Agilent SureSelect Clinical Research Exome kit (Agilent Technologies, Santa Clara, CA, USA) that targets the exome, augmented with spike-in probes covering non-coding regions known to contain risk alleles, including the 5'UTRs of *ANKRD26*, *DKC1*, *TERC*, and *TERT*, one intronic region (c.1017+572) in *GATA2* (NM\_032638.4), and two intronic regions (c.3724+78 and c.3724+139) in *RTEL1* (NM\_032957.4)<sup>1,3,4</sup>. Sequencing was performed using Illumina NextSeq technology with 150-bp paired-end reads (Illumina, San Diego, CA, USA). The mean depth of coverage per sample was over 150X, and on average more than 96% of the targeted regions were covered at a minimum of 30×. Variants within the genes associated with hereditary hematologic malignancies (HHMs) were identified and evaluated using a validated bioinformatic pipeline. The raw variants were filtered to retain high quality variants which were annotated using the Alamut-Batch software and further filtered based on the global population frequency in 1000 Genomes project, Exome Sequencing Project, and ExAC database. Sequence data were analyzed for the presence of single-nucleotide variants (SNVs) and small insertions and deletions (indels). Variants were interpreted by a team of board-certified geneticists and genetic counselors. Single nucleotide and copy number variants were classified for pathogenicity using American College of Medical Genetics and Genomics/Association for Molecular Pathology (**Figure S1**)<sup>2</sup>.

**Figure S1. Pipeline for filtering germline variants and pathogenicity annotation**

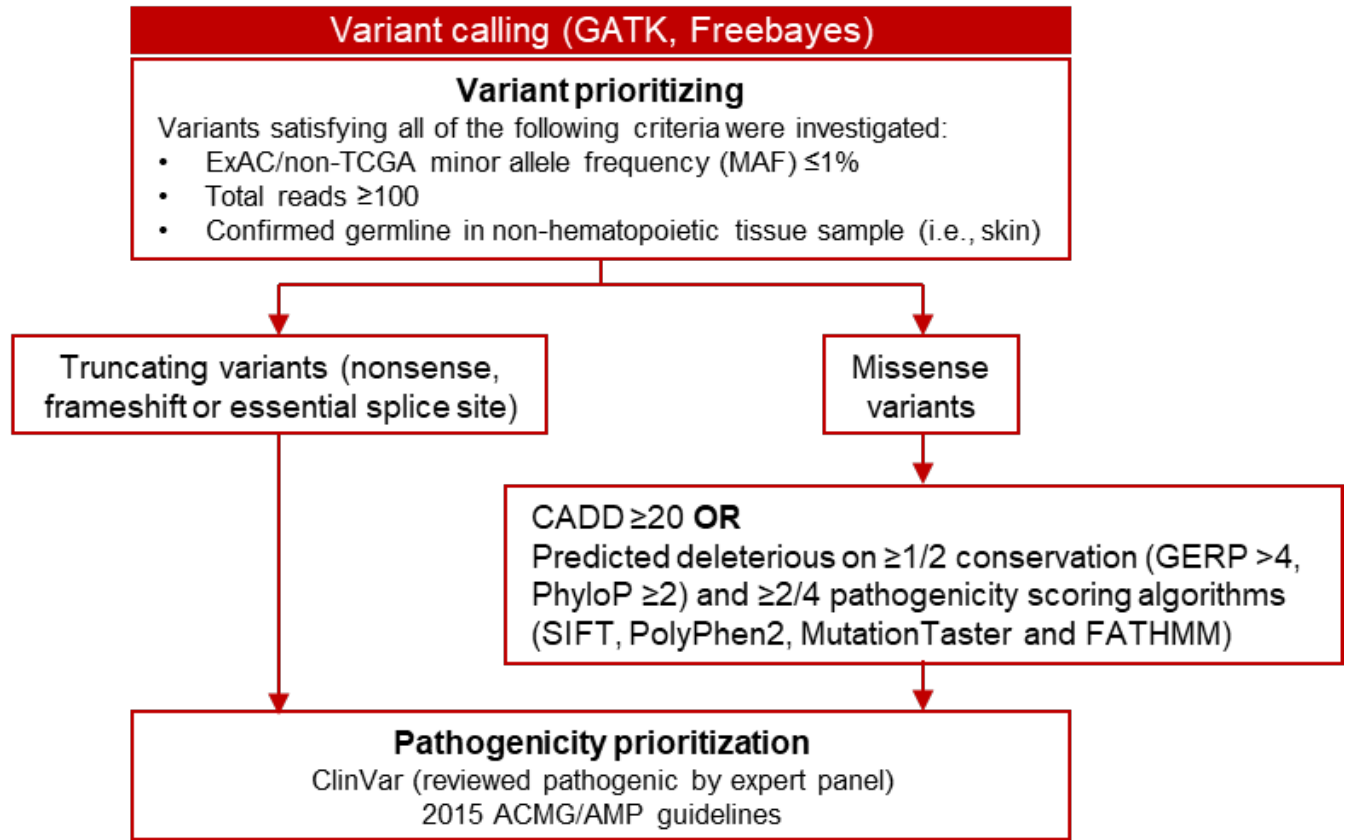

Pathogenic variants were prioritized using American College of Medical Genetics and Genomics (ACMG)/ Association for Molecular Pathology (AMP) guidelines<sup>2</sup>.

## ***Statistical analysis***

Clinical and pathologic data were available from medical records. Comparisons were made using the chi-square or Fisher's exact tests for categorical variables, and the Kruskal-Wallis test for continuous variables. Analyses of treatment outcomes used accepted definitions of complete remission (CR) and overall survival (OS)<sup>5,6</sup>. Survival estimates were calculated using the Kaplan-Meier method, and differences between curves were assessed using the log-rank test. Disease-related index (DRI) groups were assigned based on the CIBMTR refined criteria<sup>7</sup>. Multivariable logistic regression was used to integrate known clinical and genetic risk factors and potential confounders for analysis of graft-versus-host disease (GVHD). Staging of acute and chronic graft-versus-host disease (GVHD) was performed using standard algorithms<sup>8,9</sup>. All analyses were performed using JMP software v.14.0.0 (SAS Inc. Cary, NC), with  $p \leq 0.05$  considered statistically significant. Graphs were created using GraphPad Prism version 8 (GraphPad Software, La Jolla, CA).

## Supplementary Results

**Table S1. List of pathogenic/likely pathogenic (P/LP) germline variants in our inherited myeloid malignancy cohort**

| Patient nu. | Center | Gene         | P/LP variant                  |
|-------------|--------|--------------|-------------------------------|
| 1           | UofC   | <i>RUNX1</i> | p.S388X                       |
| 5           | UofC   | <i>NBN</i>   | p.K219Nfs*16                  |
| 12          | UofC   | <i>RUNX1</i> | p.R204X                       |
| 13          | UofC   | <i>TERT</i>  | p.M970V                       |
| 15          | UofC   | <i>BRCA1</i> | del exons 13-15               |
| 16          | UofC   | <i>DDX41</i> | p.D140fs                      |
| 20          | UofC   | <i>CHEK2</i> | p.I200T                       |
| 21          | UofC   | <i>CHEK2</i> | p.S428F                       |
| 22          | UofC   | <i>DDX41</i> | p.P78Qfs*3                    |
| 23          | UofC   | <i>DDX41</i> | p.P78Qfs*3                    |
| 24          | UofC   | <i>RTEL1</i> | p.R1264H                      |
| 25          | UofC   | <i>DDX41</i> | p.M1?                         |
| 26          | UofC   | <i>CHEK2</i> | p.T367Mfs*15                  |
| 27          | UofC   | <i>CHEK2</i> | p.I200T                       |
| 28          | UofC   | <i>DDX41</i> | p.A500Cfs*9                   |
| 29          | UofC   | <i>CHEK2</i> | p.I200T                       |
| 30          | UofC   | <i>ATM</i>   | c.2921+1G>A, p.?              |
| 31          | UofC   | <i>DDX41</i> | p.R164W                       |
| 32          | UofC   | <i>TP53</i>  | p.R181H                       |
| 37          | UofC   | <i>CHEK2</i> | p.I200T                       |
| 38          | UofC   | <i>DDX41</i> | p.L574R*fs143                 |
| 39          | UofC   | <i>CHEK2</i> | p.I200T                       |
| 40          | UofC   | <i>BRCA1</i> | c.3109insAA                   |
| 47          | UofC   | <i>BRCA1</i> | c.187delAG                    |
| 51          | UofC   | <i>TERC</i>  | n.357_365 del                 |
| 51          | UofC   | <i>TERT</i>  | p.A202T                       |
| 52          | UofC   | <i>BRCA2</i> | p.S1982Rfs*22                 |
| 52          | UofC   | <i>APC</i>   | p.I1307K                      |
| 54          | UofC   | <i>BRCA1</i> | c.5503_*1416del               |
| 55          | UofC   | <i>CHEK2</i> | p.Y72*                        |
| 56          | UofC   | <i>CHEK2</i> | p.I200T                       |
| 58          | UofC   | <i>DDX41</i> | p.Q41*                        |
| 59          | UofC   | <i>DDX41</i> | p.A492Gfs*17                  |
| 64          | UofC   | <i>ATM</i>   | p.V2716A                      |
| 65          | UofC   | <i>TP53</i>  | exon1 del                     |
| 65          | UofC   | <i>MLH1</i>  | p.V612del                     |
| 71          | UofC   | <i>SBDS</i>  | p.Lys62* and c.258+2T>C (p.?) |
| 72          | UofC   | <i>BLM</i>   | p.C237Afs*12                  |
| 81          | UofC   | <i>PALB2</i> | p.R170Ifs*14                  |
| 84          | UofC   | <i>GATA2</i> | c.872-46_1017+692del, p.?     |
| 85          | UofC   | <i>USB1</i>  | p.G69Dfs*46)                  |
| 87          | UofC   | <i>CHEK2</i> | p.S428F                       |
| 91          | UofC   | <i>DDX41</i> | p.M1?                         |
| 92          | UofC   | <i>DDX41</i> | p.P258L                       |
| 95          | UofC   | <i>FANCE</i> | p.R371W                       |
| 100         | UofC   | <i>DDX41</i> | p.K108Sfs*3                   |
| 101         | UofC   | <i>CHEK2</i> | p.I200T                       |
| 123         | UofC   | <i>RUNX2</i> | p.E72Qfs*102                  |
| 123         | UofC   | <i>NF2</i>   | p.W60Gfs*63                   |

|     |          |               |                              |
|-----|----------|---------------|------------------------------|
| 141 | UofC     | <i>CHEK2</i>  | p.S428F                      |
| 148 | UofC     | <i>FANCA</i>  | p.L845P and c.3624C>T, p.(=) |
| 150 | UofC     | <i>CHEK2</i>  | p.S428F                      |
| 151 | UofC     | <i>CHEK2</i>  | p.T367Mfs*15                 |
| 156 | UofC     | <i>CHEK2</i>  | p.I200T                      |
| 167 | UofC     | <i>DDX41</i>  | deletion of exons 12-17      |
| 171 | UofC     | <i>CHEK2</i>  | p.I200T                      |
| 172 | UofC     | <i>CHEK2</i>  | p.I200T                      |
| 173 | UofC     | <i>DDX41</i>  | p.D140Gfs*2                  |
| 174 | UofC     | <i>GATA2</i>  | p.A286V                      |
| 176 | UofC     | <i>APC</i>    | p.I1307K                     |
| 179 | UofC     | <i>CHEK2</i>  | p.I200T                      |
| 191 | UofC     | <i>CHEK2</i>  | p.T367Mfs*15                 |
| 193 | UofC     | <i>TP53</i>   | p.V216M                      |
| 196 | UofC     | <i>BRCA2</i>  | p.Q1089Sfs*10                |
| 207 | UofC     | <i>MUTYH</i>  | c.939+3A>C, p.?              |
| 215 | UofC     | <i>CHEK2</i>  | p.I200T                      |
| 219 | UofC     | <i>CHEK2</i>  | p.T476M                      |
| 220 | UofC     | <i>ATM</i>    | c.7630-2A>C, p.?             |
| 222 | UofC     | <i>BRCA2</i>  | p.K585fs*3                   |
| 224 | UofC     | <i>DDX41</i>  | p.M1?                        |
| 226 | UofC     | <i>BRCA2</i>  | p.R2892Tfs*14                |
| 240 | UofC     | <i>MSH6</i>   | p.Q835T                      |
| 254 | UofC     | <i>PALB2</i>  | p.R686Gfs*23                 |
| 255 | UofC     | <i>BRCA2</i>  | p.F1546Lfs*22                |
| 256 | UofC     | <i>CHEK2</i>  | p.I200T                      |
| 258 | UofC     | <i>FANCA</i>  | p.D944Gfs*5 and p.E288*      |
| 259 | UofC     | <i>BRCA1</i>  | p.Q1777Pfs*74                |
| 262 | UofC     | <i>DDX41</i>  | p.R164W                      |
| 263 | UofC     | <i>ATR</i>    | c.2634-1G>A, p.?             |
| 264 | UofC     | <i>NBN</i>    | p.N419Lfs*5                  |
| 266 | UofC     | <i>CDKN2A</i> | p.A4_P11dup                  |
| 267 | UofC     | <i>DDX41</i>  | p.L452fs                     |
| 268 | Adelaide | <i>TP53</i>   | p.E271K                      |
| 274 | Adelaide | <i>MPL</i>    | p.W398C                      |
| 284 | Adelaide | <i>MUTYH</i>  | p.Y176C                      |
| 312 | Adelaide | <i>WRAP53</i> | c.1164+1G>A                  |
| 315 | Adelaide | <i>DDX41</i>  | p.D140fs                     |
| 318 | Adelaide | <i>DDX41</i>  | p.Y516C                      |
| 330 | Adelaide | <i>DDX41</i>  | c.435-2_435-1delAGinsCA      |
| 336 | Adelaide | <i>NBN</i>    | p.K219fs                     |
| 347 | Adelaide | <i>PALB2</i>  | p.R170fs*14                  |
| 349 | Adelaide | <i>GATA2</i>  | p.T354M                      |
| 350 | Adelaide | <i>CHEK2</i>  | p.T367Mfs*15                 |
| 354 | Adelaide | <i>BLM</i>    | p.R899*                      |
| 355 | Adelaide | <i>BRCA1</i>  | p.Q1777Pfs*74                |
| 359 | Adelaide | <i>ATR</i>    | p.K1273N                     |
| 360 | Adelaide | <i>SBDS</i>   | c.258+2T>C                   |
| 362 | Adelaide | <i>RUNX1</i>  | Loss of whole gene           |
| 363 | Adelaide | <i>TERT</i>   | p.R971H                      |
| 368 | Adelaide | <i>TP53</i>   | p.R196L                      |
| 374 | Adelaide | <i>PTPN11</i> | p.M504T                      |
| 381 | Adelaide | <i>DDX41</i>  | p.M1?                        |
| 384 | Adelaide | <i>DDX41</i>  | p.D140fs                     |

|     |          |              |                    |
|-----|----------|--------------|--------------------|
| 385 | Adelaide | <i>GATA2</i> | c.1017+2T>G        |
| 390 | Adelaide | <i>DDX41</i> | p.M1?              |
| 396 | Adelaide | <i>DDX41</i> | p.D140Gfs*2        |
| 397 | Adelaide | <i>DDX41</i> | p.M1?              |
| 398 | Adelaide | <i>NBN</i>   | p.K219fs           |
| 413 | Adelaide | <i>FANCB</i> | p.R409W homozygous |
| 419 | Adelaide | <i>NF1</i>   | p.F894C            |
| 419 | Adelaide | <i>TERT</i>  | p.V56L             |
| 420 | Adelaide | <i>SBDS</i>  | p.K62*             |
| 421 | Adelaide | <i>MSH6</i>  | p.T1284fs          |
| 425 | Adelaide | <i>BRCA1</i> | p.E1257fs          |
| 427 | Adelaide | <i>DDX41</i> | c.644+5G>C p.(?)   |
| 430 | Adelaide | <i>DDX41</i> | p.T529fs           |
| 437 | Adelaide | <i>RUNX1</i> | p.R169I            |
| 438 | Adelaide | <i>RUNX1</i> | p.A324Lfs*7        |
| 443 | UPenn    | <i>DDX41</i> | p.Q41*             |
| 444 | UPenn    | <i>DDX41</i> | p.M1?              |
| 445 | UPenn    | <i>DDX41</i> | p.L452Cfs*9        |
| 448 | UPenn    | <i>DDX41</i> | p.M1?              |
| 472 | UofC     | <i>CHEK2</i> | p.I200T            |

**Table S2. Demographic characteristics of 472 patients**

|                                                                 | <b>Germline<br/><i>DDX41</i><br/>(n= 35)</b> | <b>Germline<br/><i>CHEK2</i><br/>(n= 23)</b> | <b>Other IMM<br/>(n= 63)</b> | <b>No IMM<br/>(n= 351)</b> | <b>p value</b> |
|-----------------------------------------------------------------|----------------------------------------------|----------------------------------------------|------------------------------|----------------------------|----------------|
| <b>Age at diagnosis, years,<br/>median (range)</b>              | 67 (51 – 84)                                 | 62 (39 – 82)                                 | 61 (19 – 80)                 | 66 (18 – 90)               | 0.002          |
| <b>Female, n (%)</b>                                            | 10 (28.6)                                    | 13 (56.5)                                    | 27 (42.9)                    | 158 (45)                   | 0.16           |
| <b>Diagnosis, n (%)</b>                                         |                                              |                                              |                              |                            |                |
| AML                                                             | 23 (65.7)                                    | 13 (56.5)                                    | 31 (49.2)                    | 175 (49.9)                 | 0.005          |
| MDS                                                             | 10 (28.5)                                    | 4 (17.4)                                     | 27 (42.8)                    | 139 (39.6)                 |                |
| MDS/MPN                                                         | 1 (2.9)                                      | 1 (4.4)                                      | 3 (4.8)                      | 24 (6.8)                   |                |
| MPN                                                             | 1 (2.9)                                      | 5 (21.7)                                     | 2 (3.2)                      | 13 (3.7)                   |                |
| <b>Therapy-related MN, n (%)</b>                                | 4 (11.4)                                     | 6 (26.1)                                     | 26 (41.3)                    | 132 (37.6)                 | 0.01           |
| <b>First degree relative with<br/>any cancer, n (%)</b>         | 16/19 (84.2)                                 | 21/22 (95.4)                                 | 33/38 (86.8)                 | 131/187 (70)               | 0.10           |
| <b>First degree relative with<br/>hematologic cancer, n (%)</b> | 10/19 (52.6)                                 | 9/22 (40.9)                                  | 6/38 (15.8)                  | 36/187 (19.2)              | 0.001          |

AML, acute myeloid leukemia; MDS, myelodysplastic syndromes; MN, myeloid neoplasm; MPN, myeloproliferative neoplasm; IMM, inherited myeloid malignancy

**Figure S2. Deleterious germline variants in patients with inherited myeloid malignancies**

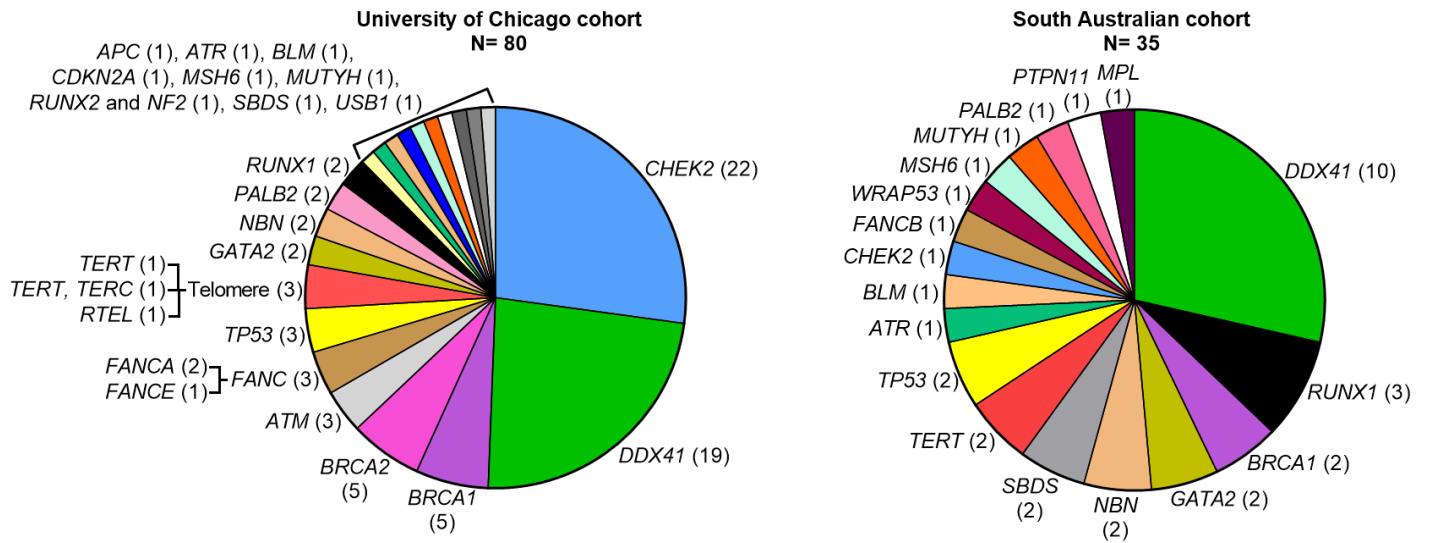

Distribution of pathogenic and likely pathogenic germline variants in University of Chicago and South Australian cohorts.



**Figure S3. Schematic representation of deleterious germline variants observed in *DDX41* and *CHEK2***

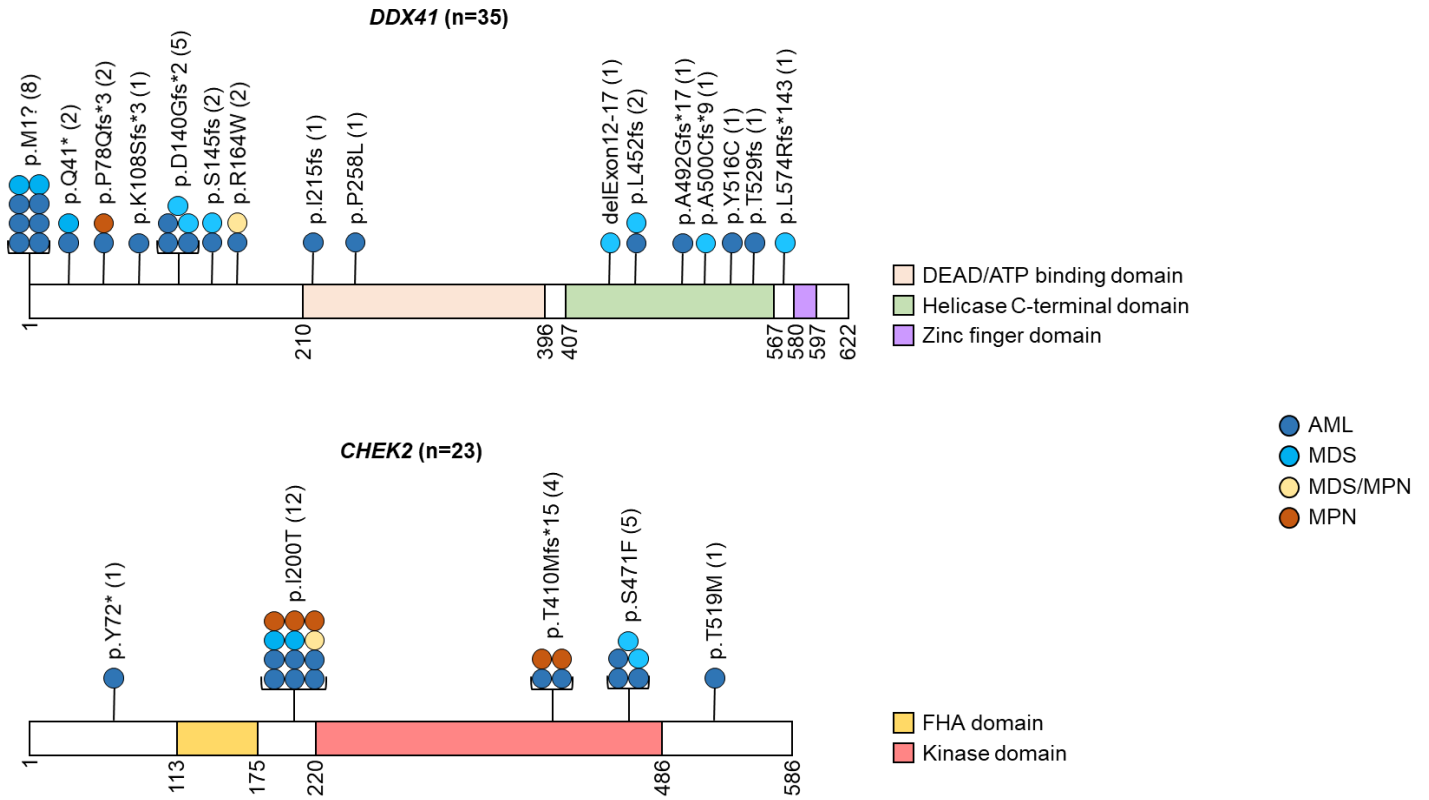

Representation of pathogenic/likely pathogenic germline variants in *DDX41* and *CHEK2*, with their recognized functional domains.

Figure S4. Chronic GVHD-free survival after allogeneic HSCT in patients with versus without P/LP germline *DDX41* variants

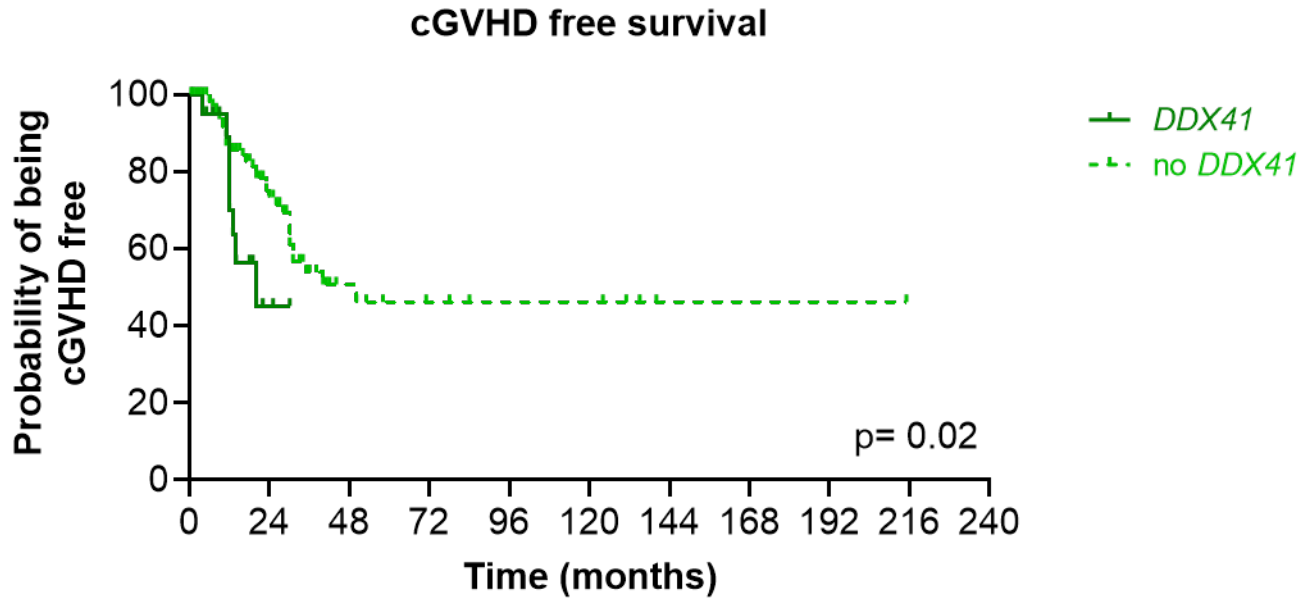

Kaplan-Meier curve showing the probability of chronic graft-versus-host disease (cGVHD) free survival in transplanted myeloid neoplasm patients stratified based on germline P/LP *DDX41* status.

**Figure S5. Clonal evolution of relapse after allogeneic hematopoietic stem cell transplant in patients with P/LP germline *DDX41* variants**

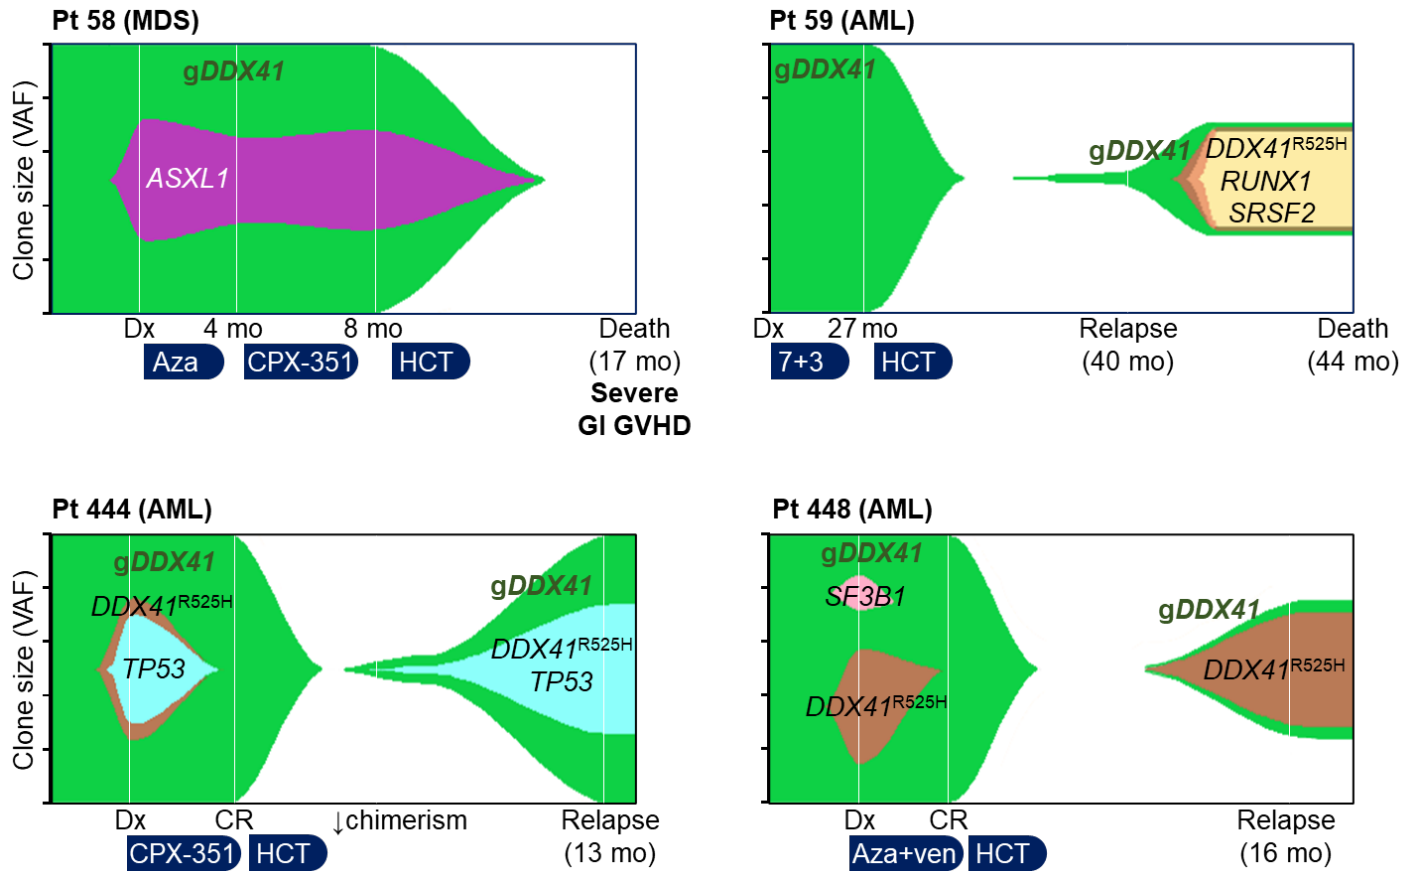

We analyzed data on four patients with pathogenic/likely pathogenic germline *DDX41* variants who underwent serial genetic assessments of their disease pre- and posttransplant. At the time of relapse after HSCT, the reduction in chimerism correlated with the re-emergence of germline *DDX41* variant. The subclonal somatic mutations (e.g., *ASXL1*, *DDX41* R525H) expanded subsequently with morphologic relapse. Pt 58 died as a result of severe GI GVHD. Patients 444 and 448 received post-transplant cyclophosphamide for GVHD prophylaxis. 7+3, 7-days of cytarabine plus 3-days of daunorubicin chemotherapy; Aza+ven, azacitidine + venetoclax; CR, complete remission; Dx, diagnosis; GI, gastrointestinal; GVHD, graft versus host disease; HSCT, hematopoietic stem cell transplant; VAF, variant allelic frequency

## References

1. Singhal D, Hahn CN, Feurstein S, et al. Targeted gene panels identify a high frequency of pathogenic germline variants in patients diagnosed with a hematological malignancy and at least one other independent cancer. *Leukemia*. 2021;35(11):3245-3256.
2. Richards S, Aziz N, Bale S, et al. Standards and guidelines for the interpretation of sequence variants: a joint consensus recommendation of the American College of Medical Genetics and Genomics and the Association for Molecular Pathology. *Genet Med*. 2015;17(5):405-424.
3. Guidugli L, Johnson AK, Alkorta-Aranburu G, et al. Clinical utility of gene panel-based testing for hereditary myelodysplastic syndrome/acute leukemia predisposition syndromes. *Leukemia*. 2017;31(5):1226-1229.
4. Singhal D, Wee LYA, Kutyna MM, et al. The mutational burden of therapy-related myeloid neoplasms is similar to primary myelodysplastic syndrome but has a distinctive distribution. *Leukemia*. 2019;33(12):2842-2853.
5. Dohner H, Estey E, Grimwade D, et al. Diagnosis and management of AML in adults: 2017 ELN recommendations from an international expert panel. *Blood*. 2017;129(4):424-447.
6. Platzbecker U, Fenaux P, Ades L, et al. Proposals for revised IWG 2018 hematological response criteria in patients with MDS included in clinical trials. *Blood*. 2019;133(10):1020-1030.
7. Armand P, Kim HT, Logan BR, et al. Validation and refinement of the Disease Risk Index for allogeneic stem cell transplantation. *Blood*. 2014;123(23):3664-3671.
8. Jagasia MH, Greinix HT, Arora M, et al. National Institutes of Health Consensus Development Project on Criteria for Clinical Trials in Chronic Graft-versus-Host Disease: I. The 2014 Diagnosis and Staging Working Group report. *Biol Blood Marrow Transplant*. 2015;21(3):389-401 e381.
9. Przepiorka D, Weisdorf D, Martin P, et al. 1994 Consensus Conference on Acute GVHD Grading. *Bone Marrow Transplant*. 1995;15(6):825-828.
